# Supplementary material for: OBLIMAP 2.0: a fast climate model–ice sheet model coupler including online embeddable mapping routines
Source: Copernicus journal article supplement (doi:10.5194/gmd-9-4111-2016), 2016-11-21
Supplement: Supplementary file 1 [file gmd-9-4111-2016-supplement.zip]

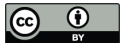

## *Supplement of*

# **OBLIMAP 2.0: a fast climate model–ice sheet model coupler including online embeddable mapping routines**

**Thomas J. Reerink et al.**

*Correspondence to:* Thomas J. Reerink ([tjreerink@gmail.com](mailto:tjreerink@gmail.com))

- [gmd-9-4111-2016-supplement-title-page.pdf](#)
- [oblimap-2.0-supplement](#)
  - LICENSE
  - README
  - README\_CONFIG
  - config-files
    - \* oblimap
  - data
    - \* bedmap2
    - \* ccsn
    - \* ice2sea
    - \* racmo2.3-antarctica
    - \* racmo2.3-greenland
  - documentation
    - \* oblimap-user-guide.pdf
  - oblimap-results
  - oblimap-sid-files
  - oblimap-to-and-fro-mapping.csh
  - src
    - \* Makefile
    - \* Makefile.ftn-cca-ecmwf
    - \* Makefile.gfortran
    - \* Makefile.gfortran-lisa
    - \* Makefile.gfortran-mp-4.9-mac
    - \* Makefile.ifort-lisa

- \* Makefile.ifort-stampede
- \* module-files
- \* object-files
- \* oblimap\_configuration\_module.f90
- \* oblimap\_convert\_module.f90
- \* oblimap\_convert\_program.f90
- \* oblimap\_embedded\_mapping\_module.f90
- \* oblimap\_gcm\_to\_im\_mapping\_module.f90
- \* oblimap\_gcm\_to\_im\_program.f90
- \* oblimap\_im\_to\_gcm\_mapping\_module.f90
- \* oblimap\_im\_to\_gcm\_program.f90
- \* oblimap\_mapping\_module.f90
- \* oblimap\_projection\_module.f90
- \* oblimap\_read\_and\_write\_module.f90
- \* oblimap\_scan\_contributions\_module.f90
- verify-oblimap-scan-search-block-size.csh

The copyright of individual parts of the supplement might differ from the CC-BY 3.0 licence.
