# Supplementary material for: OBLIMAP 2.0: a fast climate model–ice sheet model coupler including online embeddable mapping routines
Source: Copernicus journal article supplement (doi:10.5194/gmd-9-4111-2016), 2016-11-21
Supplement: Supplementary file 2 [file gmd-9-4111-2016-supplement.zip]

Archive with 86 entries (61 files):
- gmd-9-4111-2016-supplement-title-page.pdf
- oblimap-2.0-supplement/
- oblimap-2.0-supplement/oblimap-sid-files/
- oblimap-2.0-supplement/LICENSE
- oblimap-2.0-supplement/src/
- oblimap-2.0-supplement/src/oblimap_projection_module.f90
- oblimap-2.0-supplement/src/module-files/
- oblimap-2.0-supplement/src/oblimap_gcm_to_im_mapping_module.f90
- oblimap-2.0-supplement/src/Makefile
- oblimap-2.0-supplement/src/oblimap_mapping_module.f90
- oblimap-2.0-supplement/src/Makefile.gfortran-mp-4.9-mac
- oblimap-2.0-supplement/src/oblimap_gcm_to_im_program.f90
- oblimap-2.0-supplement/src/Makefile.gfortran-lisa
- oblimap-2.0-supplement/src/oblimap_scan_contributions_module.f90
- oblimap-2.0-supplement/src/oblimap_convert_program.f90
- oblimap-2.0-supplement/src/oblimap_embedded_mapping_module.f90
- oblimap-2.0-supplement/src/object-files/
- oblimap-2.0-supplement/src/Makefile.gfortran
- oblimap-2.0-supplement/src/Makefile.ifort-lisa
- oblimap-2.0-supplement/src/oblimap_im_to_gcm_mapping_module.f90
- oblimap-2.0-supplement/src/oblimap_im_to_gcm_program.f90
- oblimap-2.0-supplement/src/oblimap_read_and_write_module.f90
- oblimap-2.0-supplement/src/oblimap_convert_module.f90
- oblimap-2.0-supplement/src/Makefile.ftn-cca-ecmwf
- oblimap-2.0-supplement/src/oblimap_configuration_module.f90
- oblimap-2.0-supplement/src/Makefile.ifort-stampede
- oblimap-2.0-supplement/verify-oblimap-scan-search-block-size.csh
- oblimap-2.0-supplement/README
- oblimap-2.0-supplement/README_CONFIG
- oblimap-2.0-supplement/data/
- oblimap-2.0-supplement/data/bedmap2/
- oblimap-2.0-supplement/data/ccsm/
- oblimap-2.0-supplement/data/ccsm/ccsm_example_dec_feb_pd.nc
- oblimap-2.0-supplement/data/racmo2.3-antarctica/
- oblimap-2.0-supplement/data/racmo2.3-antarctica/data-citation.txt
- oblimap-2.0-supplement/data/racmo2.3-antarctica/mean-1979-2014-racmo2.3-atmospheric-forcing-fields-antarctica.nc
- oblimap-2.0-supplement/data/racmo2.3-greenland/
- oblimap-2.0-supplement/data/racmo2.3-greenland/mean-1958-1989-racmo2.3-atmospheric-forcing-fields-greenland.nc
- oblimap-2.0-supplement/data/racmo2.3-greenland/data-citation.txt
- oblimap-2.0-supplement/data/ice2sea/
- oblimap-2.0-supplement/oblimap-to-and-fro-mapping.csh
- oblimap-2.0-supplement/oblimap-results/
- oblimap-2.0-supplement/config-files/
- oblimap-2.0-supplement/config-files/oblimap/
- oblimap-2.0-supplement/config-files/oblimap/racmo2.3-antarctica-to-im/
- oblimap-2.0-supplement/config-files/oblimap/racmo2.3-antarctica-to-im/config-oblimap-racmo2.3-peninsula-to-im-05x05km
- oblimap-2.0-supplement/config-files/oblimap/racmo2.3-antarctica-to-im/config-oblimap-racmo2.3-antarctica-to-im-20x20km
- oblimap-2.0-supplement/config-files/oblimap/racmo2.3-antarctica-to-im/config-oblimap-racmo2.3-antarctica-to-im-40x40km
- oblimap-2.0-supplement/config-files/oblimap/convert-for-ice2sea/
- oblimap-2.0-supplement/config-files/oblimap/convert-for-ice2sea/config_oblimap_convert_ice2sea_01x01km
- oblimap-2.0-supplement/config-files/oblimap/racmo2.3-greenland-to-im/
- oblimap-2.0-supplement/config-files/oblimap/racmo2.3-greenland-to-im/config-oblimap-racmo2.3-to-im-greenland-10x10km
- oblimap-2.0-supplement/config-files/oblimap/racmo2.3-greenland-to-im/config-oblimap-racmo2.3-to-im-greenland-05x05km
- oblimap-2.0-supplement/config-files/oblimap/racmo2.3-greenland-to-im/config-oblimap-racmo2.3-to-im-greenland-02x02km
- oblimap-2.0-supplement/config-files/oblimap/im-to-racmo2.3-antarctica/
- oblimap-2.0-supplement/config-files/oblimap/im-to-racmo2.3-antarctica/config-oblimap-im-to-racmo2.3-antarctica-40x40km
- oblimap-2.0-supplement/config-files/oblimap/im-to-racmo2.3-antarctica/config-oblimap-im-to-racmo2.3-antarctica-20x20km
- oblimap-2.0-supplement/config-files/oblimap/im-to-racmo2.3-antarctica/config-oblimap-im-to-racmo2.3-peninsula-05x05km
- oblimap-2.0-supplement/config-files/oblimap/im-to-ccsm/
- oblimap-2.0-supplement/config-files/oblimap/im-to-ccsm/config_oblimap_im_to_ccsm_antarctica
- oblimap-2.0-supplement/config-files/oblimap/im-to-ccsm/config_oblimap_im_to_ccsm_himalaya
- oblimap-2.0-supplement/config-files/oblimap/im-to-ccsm/config_oblimap_im_to_ccsm_hemisphere
- oblimap-2.0-supplement/config-files/oblimap/im-to-ccsm/config_oblimap_im_to_ccsm_greenland
- oblimap-2.0-supplement/config-files/oblimap/bedmap2-to-im/
- oblimap-2.0-supplement/config-files/oblimap/bedmap2-to-im/config_oblimap_bedmap2_to_im_antarctica_20x20km
- oblimap-2.0-supplement/config-files/oblimap/bedmap2-to-im/config_oblimap_bedmap2_to_im_peninsula_05x05km
- oblimap-2.0-supplement/config-files/oblimap/ice2sea-to-im/
- oblimap-2.0-supplement/config-files/oblimap/ice2sea-to-im/config_oblimap_ice2sea_to_im_greenland_01x01km
- oblimap-2.0-supplement/config-files/oblimap/ice2sea-to-im/config_oblimap_ice2sea_to_im_greenland_20x20km
- oblimap-2.0-supplement/config-files/oblimap/ice2sea-to-im/config_oblimap_ice2sea_to_im_jakobshavn_01x01km
- oblimap-2.0-supplement/config-files/oblimap/ice2sea-to-im/config_oblimap_ice2sea_to_im_greenland_10x10km
- oblimap-2.0-supplement/config-files/oblimap/ice2sea-to-im/config_oblimap_ice2sea_to_im_greenland_02x02km
- oblimap-2.0-supplement/config-files/oblimap/ice2sea-to-im/config_oblimap_ice2sea_to_im_greenland_05x05km
- oblimap-2.0-supplement/config-files/oblimap/convert-for-bedmap2/
- oblimap-2.0-supplement/config-files/oblimap/convert-for-bedmap2/config_oblimap_convert_bedmap2_01x01km
- oblimap-2.0-supplement/config-files/oblimap/im-to-racmo2.3-greenland/
- oblimap-2.0-supplement/config-files/oblimap/im-to-racmo2.3-greenland/config-oblimap-im-to-racmo2.3-greenland-10x10km
- oblimap-2.0-supplement/config-files/oblimap/im-to-racmo2.3-greenland/config-oblimap-im-to-racmo2.3-greenland-02x02km
- oblimap-2.0-supplement/config-files/oblimap/im-to-racmo2.3-greenland/config-oblimap-im-to-racmo2.3-greenland-05x05km
- oblimap-2.0-supplement/config-files/oblimap/ccsm-to-im/
- oblimap-2.0-supplement/config-files/oblimap/ccsm-to-im/config_oblimap_ccsm_to_im_greenland
- oblimap-2.0-supplement/config-files/oblimap/ccsm-to-im/config_oblimap_ccsm_to_im_himalaya
- oblimap-2.0-supplement/config-files/oblimap/ccsm-to-im/config_oblimap_ccsm_to_im_antarctica
- oblimap-2.0-supplement/config-files/oblimap/ccsm-to-im/config_oblimap_ccsm_to_im_hemisphere
- oblimap-2.0-supplement/documentation/
- oblimap-2.0-supplement/documentation/oblimap-user-guide.pdf
