# Supplementary material for: OBLIMAP 2.0: a fast climate model–ice sheet model coupler including online embeddable mapping routines
Source: Copernicus journal article supplement (doi:10.5194/gmd-9-4111-2016), 2016-11-21
Supplement: Supplementary file 2 [file gmd-9-4111-2016-supplement.zip › oblimap-2.0-supplement/config-files/oblimap/ccsm-to-im/config_oblimap_ccsm_to_im_greenland]

! ./src/oblimap_gcm_to_im_program config-files/oblimap/ccsm-to-im/config_oblimap_ccsm_to_im_greenland

&CONFIG 

! Grid:
NLON_config                                               =    128                                                ! The number of GCM grid points in the longitude direction
NLAT_config                                               =     64                                                ! The number of GCM grid points in the latitude  direction

NX_config                                                 =     76                                                ! The number of IM grid points in the x-direction
NY_config                                                 =    141                                                ! The number of IM grid points in the y-direction
dx_config                                                 =  20000                                                ! The           IM grid size   in the x-direction (in meter)
dy_config                                                 =  20000                                                ! The           IM grid size   in the y-direction (in meter)

! Projection:
lambda_M_config                                           =    320                                                ! The longitude coordinate of the middle point of projection (in degrees)
phi_M_config                                              =     72                                                ! The latitude  coordinate of the middle point of projection (in degrees)
alpha_stereographic_config                                =      7.5                                              ! alpha determines the standard parallel of the projection (in degrees)
choice_projection_method_config                           = 'oblique_stereographic_projection' 

! Scanning:
scanning_mode_config                                      = .TRUE.
level_of_automatic_oblimap_scanning_config                =      3
scan_search_block_size_config                             =      5                                                ! To apply this conf variable the level_of_automatic_oblimap_scanning_config must be below 3
sid_filename_config                                       = './oblimap-sid-files/sid-file-ccsm-to-im-greenland.txt'

! Interpolation:
R_search_interpolation_config                             =  16000
shepard_exponent_config                                   =      2
nearest_point_assignment_config                           = .FALSE.

! File and field properties:
gcm_input_filename_config                                 = './data/ccsm/ccsm_example_dec_feb_pd.nc'
gcm_record_range_config                                   = 1,1

number_of_mapped_fields_config                            = 3
gcm_field_name_config(-4)                                 = 'lat'                                                 ! Should match with the gcm input file
gcm_field_name_config(-2)                                 = 'lon'                                                 ! Should match with the gcm input file
gcm_field_name_config(1)                                  = 'TS'                                                  ! Should match with the gcm input file
gcm_field_name_config(2)                                  = 'Accumulation'                                        ! Should match with the gcm input file
gcm_field_name_config(3)                                  = 'PHIS'                                                ! Should match with the gcm input file

im_field_name_config(1)                                   = 'Ts'
im_field_name_config(2)                                   = 'MB_surface'
im_field_name_config(3)                                   = 'Hs'

im_field_unit_config(-4)                                  = 'meter'
im_field_unit_config(-2)                                  = 'meter'
im_field_unit_config(1)                                   = 'Kelvin'
im_field_unit_config(2)                                   = 'mieq'
im_field_unit_config(3)                                   = 'meter'

im_field_longname_config(-4)                              = 'y-axis (meter)'
im_field_longname_config(-2)                              = 'x-axis (meter)'
im_field_longname_config(1)                               = 'surface temperature (Kelvin)'
im_field_longname_config(2)                               = 'surface mass balance (meter ice equivalent)'
im_field_longname_config(3)                               = 'surface height (meter)'

field_factor_config(1)                                    = 1
field_factor_config(2)                                    = 34677959.74
field_factor_config(3)                                    = 0.1019368

invalid_input_value_config(1)                             = -9999
invalid_input_value_config(2)                             = -9999
invalid_input_value_config(3)                             = -9999

im_created_filename_config                                = 'oblimap-results/im_greenland_Ts_MB_surface_Hs_A.nc'

! Messaging:
protect_file_overwriting_config                           = .FALSE.
oblimap_message_level_config                              = 0
/
