# Supplementary material for: OBLIMAP 2.0: a fast climate model–ice sheet model coupler including online embeddable mapping routines
Source: Copernicus journal article supplement (doi:10.5194/gmd-9-4111-2016), 2016-11-21
Supplement: Supplementary file 2 [file gmd-9-4111-2016-supplement.zip › oblimap-2.0-supplement/config-files/oblimap/ice2sea-to-im/config_oblimap_ice2sea_to_im_jakobshavn_01x01km]

! ./src/oblimap_gcm_to_im_program config-files/oblimap/ice2sea-to-im/config_oblimap_ice2sea_to_im_jakobshavn_01x01km
! Mapping the ice2sea data on to an IM grid for Jakobshavn.

&CONFIG 
NLON_config                                               =   2501                                                ! The number of GCM grid points in the longitude direction
NLAT_config                                               =   3001                                                ! The number of GCM grid points in the latitude  direction

NX_config                                                 =    400                                                ! The number of IM grid points in the x-direction
NY_config                                                 =    120                                                ! The number of IM grid points in the y-direction
dx_config                                                 =   1000                                                ! The           IM grid size   in the x-direction (in meter)
dy_config                                                 =   1000                                                ! The           IM grid size   in the y-direction (in meter)

lambda_M_config                                           =    313.5                                              ! The longitude coordinate of the middle point of projection (in degrees)
phi_M_config                                              =     69.2                                              ! The latitude  coordinate of the middle point of projection (in degrees)
alpha_stereographic_config                                =      1.0                                              ! alpha determines the standard parallel of the projection (in degrees)
choice_projection_method_config                           = 'oblique_stereographic_projection_ellipsoid_snyder'

scanning_mode_config                                      = .TRUE.
sid_filename_config                                       = './oblimap-sid-files/sid-file-ice2sea-to-im-jakobshavn-01x01km.txt'
!scan_search_block_size_config                             = 2
R_search_interpolation_config                             = 8000
shepard_exponent_config                                   = 2
nearest_point_assignment_config                           = .TRUE.

! The input data below is obtained by: ./src/oblimap_convert_program config-files/oblimap/convert-for-ice2sea/config_oblimap_convert_ice2sea_01x01km
gcm_input_filename_config                                 = './data/ice2sea/ice2sea_greenland_geometry_1km_updated_at_lon_lat.nc'
gcm_record_range_config                                   = 1,1


number_of_mapped_fields_config                            = 5
im_field_name_config(1)                                   = 'Surface Elevation'
im_field_name_config(2)                                   = 'Ice Thickness'
im_field_name_config(3)                                   = 'Bedrock Elevation'
im_field_name_config(4)                                   = 'longitude'
im_field_name_config(5)                                   = 'latitude'
gcm_field_name_config(-4)                                 = 'latitude'                                            ! Should match with the gcm input file
gcm_field_name_config(-2)                                 = 'longitude'                                           ! Should match with the gcm input file
gcm_field_name_config(1)                                  = 'Surface Elevation'                                   ! Should match with the gcm input file
gcm_field_name_config(2)                                  = 'Ice Thickness'                                       ! Should match with the gcm input file
gcm_field_name_config(3)                                  = 'Bedrock Elevation'                                   ! Should match with the gcm input file
gcm_field_name_config(4)                                  = 'longitude'                                           ! Should match with the gcm input file
gcm_field_name_config(5)                                  = 'latitude'                                            ! Should match with the gcm input file

im_field_unit_config(-4)                                  = 'meter'
im_field_unit_config(-2)                                  = 'meter'
im_field_unit_config(1)                                   = 'meter'
im_field_unit_config(2)                                   = 'meter'
im_field_unit_config(3)                                   = 'meter'
im_field_unit_config(4)                                   = 'degrees'
im_field_unit_config(5)                                   = 'degrees'

im_field_longname_config(-4)                              = 'y-axis (meter)'
im_field_longname_config(-2)                              = 'x-axis (meter)'
im_field_longname_config(1)                               = 'Surface Elevation (meter)'
im_field_longname_config(2)                               = 'Ice Thickness (meter)'
im_field_longname_config(3)                               = 'Bedrock Elevation (meter)'
im_field_longname_config(4)                               = 'longitude (degrees)'
im_field_longname_config(5)                               = 'latitude (degrees)'

field_which_determines_invalid_value_mask_config(1)       = -1
field_which_determines_invalid_value_mask_config(2)       = -2
field_which_determines_invalid_value_mask_config(3)       =  3
field_which_determines_invalid_value_mask_config(4)       = -4
field_which_determines_invalid_value_mask_config(5)       = -5

invalid_input_value_config(3)                             = -9999

im_created_filename_config                                = './oblimap-results/initial_jakobshavn_ice2sea_01x01km.nc'
protect_file_overwriting_config                           = .FALSE.
oblimap_message_level_config                              = 0
/
