# Supplementary material for: OBLIMAP 2.0: a fast climate model–ice sheet model coupler including online embeddable mapping routines
Source: Copernicus journal article supplement (doi:10.5194/gmd-9-4111-2016), 2016-11-21
Supplement: Supplementary file 2 [file gmd-9-4111-2016-supplement.zip › oblimap-2.0-supplement/config-files/oblimap/im-to-ccsm/config_oblimap_im_to_ccsm_antarctica]

! ./src/oblimap_im_to_gcm_program config-files/oblimap/im-to-ccsm/config_oblimap_im_to_ccsm_antarctica

&CONFIG 
NLON_config                                               =    128                                                ! The number of GCM grid points in the longitude direction
NLAT_config                                               =     64                                                ! The number of GCM grid points in the latitude  direction

NX_config                                                 =    281                                                ! The number of IM grid points in the x-direction
NY_config                                                 =    281                                                ! The number of IM grid points in the y-direction
dx_config                                                 =  20000                                                ! The           IM grid size   in the x-direction (in meter)
dy_config                                                 =  20000                                                ! The           IM grid size   in the y-direction (in meter)

lambda_M_config                                           =      0                                                ! The longitude coordinate of the middle point of projection (in degrees)
phi_M_config                                              =    -90                                                ! The latitude  coordinate of the middle point of projection (in degrees)
alpha_stereographic_config                                =     19                                                ! alpha determines the standard parallel of the projection (in degrees)
choice_projection_method_config                           = 'oblique_stereographic_projection' 

scanning_mode_config                                      = .TRUE.
sid_filename_config                                       = './oblimap-sid-files/sid-file-im-to-ccsm-antarctica.txt'
!scan_search_block_size_config                             = 28
R_search_interpolation_config                             = 125000
shepard_exponent_config                                   = 2
nearest_point_assignment_config                           = .FALSE.

gcm_input_filename_config                                 = './data/ccsm/ccsm_example_dec_feb_pd.nc'
gcm_record_range_config                                   = 1,1

im_input_filename_config                                  = 'oblimap-results/im_antarctica_Ts_MB_surface_Hs_A.nc'
im_record_range_config                                    = 1,1

number_of_mapped_fields_config                            = 3
gcm_field_name_config(-4)                                 = 'lat'                                                 ! Should match with the gcm input file
gcm_field_name_config(-2)                                 = 'lon'                                                 ! Should match with the gcm input file
gcm_field_name_config(1)                                  = 'TS'                                                  ! Should match with the gcm input file
gcm_field_name_config(2)                                  = 'Accumulation'                                        ! Should match with the gcm input file
gcm_field_name_config(3)                                  = 'PHIS'                                                ! Should match with the gcm input file

im_field_name_config(1)                                   = 'Ts'                                                  ! Should match with the  im input file
im_field_name_config(2)                                   = 'MB_surface'                                          ! Should match with the  im input file
im_field_name_config(3)                                   = 'Hs'                                                  ! Should match with the  im input file

gcm_field_unit_config(-4)                                 = 'degrees north'
gcm_field_unit_config(-2)                                 = 'degrees east'
gcm_field_unit_config(1)                                  = 'Kelvin'
gcm_field_unit_config(2)                                  = 'm/s weq'
gcm_field_unit_config(3)                                  = 'm2/s2'

gcm_field_longname_config(-4)                             = 'latitude (degrees north)'
gcm_field_longname_config(-2)                             = 'longitude (degrees east)'
gcm_field_longname_config(1)                              = 'surface temperature (Kelvin)'
gcm_field_longname_config(2)                              = 'accumulation (m/s water equivalent)'
gcm_field_longname_config(3)                              = 'Surface geopotential (m2/s2)'

field_factor_config(1)                                    = 1
field_factor_config(2)                                    = 2.883675993E-08
field_factor_config(3)                                    = 9.81

invalid_input_value_config(1)                             = -9999
invalid_input_value_config(2)                             = -9999
invalid_input_value_config(3)                             = -9999

gcm_created_filename_config                               = 'oblimap-results/gcm_antarctica_Ts_MB_surface_Hs_A.nc'
protect_file_overwriting_config                           = .FALSE.
oblimap_message_level_config                              = 0
/
