# Supplementary material for: OBLIMAP 2.0: a fast climate model–ice sheet model coupler including online embeddable mapping routines
Source: Copernicus journal article supplement (doi:10.5194/gmd-9-4111-2016), 2016-11-21
Supplement: Supplementary file 2 [file gmd-9-4111-2016-supplement.zip › oblimap-2.0-supplement/data/racmo2.3-antarctica/data-citation.txt]

The provided netcdf file:
 mean-1979-2014-racmo2.3-atmospheric-forcing-fields-antarctica.nc
contains a set of RACMO2.3 atmospheric forcing fields which represent a present
day average for Antarctica (being a 1979-2014 yearly mean time average). The 
fields can be mapped with OBLIMAP on any grid of preference and can be used to
force an ice sheet model.

This data set collection is composed by Thomas Reerink (IMAU) who also provided
the meta data and proper missing values. The data source is: RACMO2.3 (KNMI), 
creation date: Feb 11 2015, from ERAIN_r490 processed by Melchior van Wessem (IMAU)

This data set should therefore be referenced as: 

A 1979-2014 mean RACMO2.3 atmospheric forcing data set of Antarctica 
(Reerink et al., 2016; Van Wessem et al. 2014)


Reerink, T. J., W. van de Berg, and R. S. W. van de Wal (2016), Fast GCM - ice sheet 
model coupling software OBLIMAP 2.0, including on-line embeddable mapping routines, 
Geoscientific Model Development, http://www.geosci-model-dev-discuss.net/gmd-2016-124/
doi:10.5194/gmd-2016-124

Van Wessem, J., Reijmer, C., Morlighem, M., Mouginot, J., Rignot, E., Medley, B., 
Joughin, I., Wouters, B., Depoorter, M., Bamber, J., Lenaerts, J., Van De Berg, W., 
Van Den Broeke, M., and Van Meijgaard, E. (2014), Improved representation of East Antarctic 
surface mass balance in a regional atmospheric climate model, Journal of Glaciology, 
60, 761-770, doi:10.3189/2014JoG14J051
