# Supplementary material for: OBLIMAP 2.0: a fast climate model–ice sheet model coupler including online embeddable mapping routines
Source: Copernicus journal article supplement (doi:10.5194/gmd-9-4111-2016), 2016-11-21
Supplement: Supplementary file 2 [file gmd-9-4111-2016-supplement.zip › oblimap-2.0-supplement/data/racmo2.3-greenland/data-citation.txt]

The provided netcdf file:
 mean-1958-1989-racmo2.3-atmospheric-forcing-fields-greenland.nc
contains a set of RACMO2.3 atmospheric forcing fields which represent a present
day average for Greenland (being a 1958-1989 yearly mean time average). The 
fields can be mapped with OBLIMAP on any grid of preference and can be used to
force an ice sheet model.

This data set collection is composed by Thomas Reerink (IMAU) who also provided
the meta data and proper missing values. The data source is: RACMO2.3 (KNMI), 
creation date: Feb 10 2016, domain: ZGRN11, experiment: BN_1958_2014 processed 
by Brice Noel (IMAU).

This data set should therefore be referenced as: 

A 1958-1989 mean RACMO2.3 atmospheric forcing data set of Greenland 
(Reerink et al., 2016; Van Wessem et al. 2014)


Reerink, T. J., W. van de Berg, and R. S. W. van de Wal (2016), Fast GCM - ice sheet 
model coupling software OBLIMAP 2.0, including on-line embeddable mapping routines, 
Geoscientific Model Development, http://www.geosci-model-dev-discuss.net/gmd-2016-124/
doi:10.5194/gmd-2016-124

No�l, B., van de Berg, W. J., van Meijgaard, E., Kuipers Munneke,P., van de Wal, R. S. W., 
and van den Broeke, M. R. (2015), Evaluation of the updated regional climate model RACMO2.3:
summer snowfall impact on the Greenland Ice Sheet, The Cryosphere, 9, 1831-1844, 
doi:10.5194/tc-9-1831-2015, http://www.the-cryosphere.net/9/1831/2015/
