# Supplementary material for: OBLIMAP 2.0: a fast climate model–ice sheet model coupler including online embeddable mapping routines
Source: Copernicus journal article supplement (doi:10.5194/gmd-9-4111-2016), 2016-11-21
Supplement: Supplementary file 2 [file gmd-9-4111-2016-supplement.zip › oblimap-2.0-supplement/README_CONFIG]

 In the configuration files (config files) several fortran NAMELIST-options
 can be specified. It is strongly recommended to use a config file and to
 specify all the config variables for your experiment. However, all config
 variables are initialised by a default value in the
  src/oblimap_configuration_module.f90
 in case no config file is used or in case a config variable is omitted in
 the config file. Examples of config files can be found in the directory:
  config-files/oblimap/

 Each config variable and its useful range is listed below. The Maximum Number
 of Fields (MNF) which can be mapped simultaneously is 100 by default, but can
 be raised to any positive integer in
  src/oblimap_configuration_module.f90
 whereupon the OBLIMAP code has to be (re)compiled. The Maximum Number of 
 Dimensions (MND) is a negative number to allocate space in these arrays 
 for the names of the  dimensions and the dimesion variables, it is currently 
 set to -7.

 gcm_input_filename_config                        = any CHARACTER string (maximum of 256 characters)
 im_input_filename_config                         = any CHARACTER string (maximum of 256 characters)
 NLON_config                                      = any positive INTEGER
 NLAT_config                                      = any positive INTEGER
 NX_config                                        = any positive INTEGER
 NY_config                                        = any positive INTEGER
 dx_config                                        = any positive REAL
 dy_config                                        = any positive REAL
 choice_projection_method_config                  = 'oblique_stereographic_projection'
                                                    'oblique_stereographic_projection_snyder'
                                                    'oblique_stereographic_projection_ellipsoid_snyder'
                                                    'oblique_lambert_equal-area_projection_snyder'
                                                    'oblique_lambert_equal-area_projection_ellipsoid_snyder'
                                                    'rotation_projection'
 earth_radius_config                              = any positive REAL (meter)
 ellipsoid_semi_major_axis_config                 = any positive REAL (meter)
 ellipsoid_eccentricity_config                    = any REAL between 0 and 1
 lambda_M_config                                  = any REAL between   0 and 360 degrees
 phi_M_config                                     = any REAL between -90 and  90 degrees
 alpha_stereographic_config                       = any REAL between   0 and  90 degrees
 theta_rotation_projection_config                 = any REAL between   0 and 360 degrees
 shift_x_coordinate_rotation_projection_config    = any REAL (meter)
 shift_y_coordinate_rotation_projection_config    = any REAL (meter)
 enable_shift_im_grid_config                      = TRUE or FALSE
 shift_x_coordinate_im_grid_config                = any REAL (meter)
 shift_y_coordinate_im_grid_config                = any REAL (meter)
 alternative_lambda_for_center_im_grid_config     = any REAL (degrees)
 alternative_phi_for_center_im_grid_config        = any REAL (degrees)
 unit_conversion_x_ax_config                      = any REAL
 unit_conversion_y_ax_config                      = any REAL
 use_prefabricated_im_grid_coordinates_config     = TRUE or FALSE
 prefabricated_im_grid_filename_config            = any CHARACTER string (maximum of 256 characters)
 scanning_mode_config                             = TRUE or FALSE
 level_of_automatic_oblimap_scanning_config       = INTEGER in the range 0 to 5
 data_set_is_cyclic_in_longitude_config           = TRUE or FALSE
 choice_quadrant_method_config                    = TRUE or FALSE
 R_search_interpolation_config                    = any positive REAL (meter)
 scan_search_block_size_config                    = any INTEGER starting from -3 (where -3, -2 and -1 are special cases, -3 is default)
 scan_search_block_size_step_config               = any positive INTEGER starting from 2 (with 2 the recommended default)
 vincenty_method_for_ellipsoid_config             = TRUE or FALSE
 sid_filename_config                              = any CHARACTER string (maximum of 256 characters)
 backward_sid_filename_config                     = any CHARACTER string (maximum of 256 characters)
 oblimap_allocate_factor_config                   = any positive REAL
 oblimap_message_level_config                     = INTEGER in the range 1 to 3
 suppress_check_on_scan_parameters_config         = TRUE or FALSE
 nearest_point_assignment_config                  = TRUE or FALSE
 shepard_exponent_config                          = any positive REAL, usually 2
 invalid_input_value_config                       = DIMENSION(  1:MNF): array with:  any REAL
 invalid_output_value_config                      = DIMENSION(  1:MNF): array with:  any REAL
 field_which_determines_invalid_value_mask_config = DIMENSION(  1:MNF): array with:  any INTEGER (if > 1, the field is masked mapped)
 invalid_value_mask_criterion_config              = DIMENSION(  1:MNF): array with:  INTEGER in the range 1 to 2
 gcm_record_range_config                          = DIMENSION(2): positive INTEGER's:
                                                     format: starting desired record number, ending desired record number
 im_record_range_config                           = DIMENSION(2): positive INTEGER's:
                                                     format: starting desired record number, ending desired record number
 number_of_vertical_layers_config                 = any positive INTEGER (default 1)
 number_of_mapped_fields_config                   = any positive INTEGER, i.e. up to MNF = 100, but MNF can be increased in 
                                                     oblimap_configuration_module.f90
 ignore_reading_pre_mapped_fields_config          = DIMENSION(MND:MNF): array with:  TRUE or FALSE
 gcm_field_name_config                            = DIMENSION(MND:MNF): array with:  any CHARACTER string (maximum of 128 characters)
 gcm_field_unit_config                            = DIMENSION(MND:MNF): array with:  any CHARACTER string (maximum of 128 characters)
 gcm_field_longname_config                        = DIMENSION(MND:MNF): array with:  any CHARACTER string (maximum of 256 characters)
 im_field_name_config                             = DIMENSION(MND:MNF): array with:  any CHARACTER string (maximum of 128 characters)
 im_field_unit_config                             = DIMENSION(MND:MNF): array with:  any CHARACTER string (maximum of 128 characters)
 im_field_longname_config                         = DIMENSION(MND:MNF): array with:  any CHARACTER string (maximum of 256 characters)
 prefabricated_im_grid_field_name_config          = DIMENSION(MND:MNF): array with:  any CHARACTER string (maximum of 128 characters)
 field_factor_config                              = DIMENSION(  0:MNF): array with:  any REAL
 field_shift_config                               = DIMENSION(  0:MNF): array with:  any REAL
 gcm_created_filename_config                      = any CHARACTER string (maximum of 256 characters)
 im_created_filename_config                       = any CHARACTER string (maximum of 256 characters)
 reduce_dummy_dimensions_config                   = TRUE or FALSE
 use_double_instead_of_float_in_netcdf            = TRUE or FALSE
 synchronize_netcdf_writing                       = TRUE or FALSE
 protect_file_overwriting_config                  = TRUE or FALSE
 enable_color_messaging_in_terminal               = TRUE or FALSE


 The OBLIMAP User Guide provides a more extended description:
  https://github.com/oblimap/oblimap-2.0/blob/master/documentation/oblimap-user-guide.pdf

 Thomas Reerink
 October 2016
