# Supplementary material for: OBLIMAP 2.0: a fast climate model–ice sheet model coupler including online embeddable mapping routines
Source: Copernicus journal article supplement (doi:10.5194/gmd-9-4111-2016), 2016-11-21
Supplement: Supplementary file 2 [file gmd-9-4111-2016-supplement.zip › oblimap-2.0-supplement/src/Makefile.gfortran-mp-4.9-mac]

# Configuration for the fortran gfortran-mp-4.9 compiler (Mac OS X 10.10):

# Compiler names:
  F90 = gfortran-mp-4.9

# Setting the path for the netcdf libraries:
  NETCDF_PATH = /opt/local

# Compiler flags:
  COMPILER_FLAGS_BASIC    = -O3 -J${MOD_PATH} -Wall -ffree-line-length-none
  COMPILER_FLAGS_CHECK    = -fbounds-check -fcheck-array-temporaries
  COMPILER_FLAGS_NETCDF   = -I${NETCDF_PATH}/include
  COMPILER_FLAGS_PROFILE  = -p
  COMPILER_FLAGS_VALGRIND = -g

# Compiler flag combination choices:
  F90FLAGS_CHOICE_1       = ${COMPILER_FLAGS_BASIC} ${COMPILER_FLAGS_CHECK} ${COMPILER_FLAGS_NETCDF}
  F90FLAGS_CHOICE_2       = ${COMPILER_FLAGS_BASIC} ${COMPILER_FLAGS_CHECK} ${COMPILER_FLAGS_NETCDF} ${COMPILER_FLAGS_PROFILE}
  F90FLAGS_CHOICE_3       = ${COMPILER_FLAGS_BASIC} ${COMPILER_FLAGS_CHECK} ${COMPILER_FLAGS_NETCDF}                           ${COMPILER_FLAGS_VALGRIND}

# Compiling options concern including the profiling or the valgrind debugging mode:
  F90FLAGS                = ${F90FLAGS_CHOICE_2}

# Linking flags of libaries:
  LINK_FLAGS_NETCDF       = -L${NETCDF_PATH}/lib -lnetcdf -lnetcdff
  LDFLAGS                 = ${LINK_FLAGS_NETCDF}


#   Compiler flags                    Specification
#
#  -O3                                is the  optimalisation flag (causing faster executables)
#  -J${MOD_PATH}                      is the  path of the directory with all the *.mod files  
#  -Wall                              is the  optimalisation flag
#  -ffree-line-length-none            is the -ffree-line-length-n, sets n columns after which characters are ignored
#                                            -ffree-line-length-none = -ffree-line-length-0
#  -fbounds-check                     is the  flag for checking array boundaries
#  -fcheck-array-temporaries          is the  flag for checking array substitution
#  -I${NETCDF_PATH}/include           is the  path to the netcdf include files  
#  -p                                 is the  flag for profiling with gmon (sometimes better to turn off if using valgrind)
#  -g                                 is the  flag which should be turned on if the valgrind debugger is used
#
# Linking flags of libaries:
#  -L${NETCDF_PATH}/lib               is the  netcdf libary path
#  -lnetcdf                           is the  netcdf c libary
#  -lnetcdff                          is the  netcdf fortran libary
  

# Other gfortran compiler flags (for better checks with compilation):
# -Wuninitialized -O -ftrapv -fno-automatic -fimplicit-none

# Linking the fortran compiler with  -g -w  for debugging with valgrind but omit profiling while using valgrind:
# valgrind --log-file=log-valgrind-gcm_to_im.bug --tool=memcheck --leak-check=yes --show-reachable=yes --num-callers=20 --track-fds=yes --track-origins=yes ./src/oblimap_gcm_to_im_program config-files/oblimap/ccsm-to-im/config_oblimap_ccsm_to_im_greenland
# valgrind --log-file=log-valgrind-im_to_gcm.bug --tool=memcheck --leak-check=yes --show-reachable=yes --num-callers=20 --track-fds=yes --track-origins=yes ./src/oblimap_im_to_gcm_program config-files/oblimap/im-to-ccsm/config_oblimap_im_to_ccsm_greenland
