# Supplementary material for: OBLIMAP 2.0: a fast climate model–ice sheet model coupler including online embeddable mapping routines
Source: Copernicus journal article supplement (doi:10.5194/gmd-9-4111-2016), 2016-11-21
Supplement: Supplementary file 2 [file gmd-9-4111-2016-supplement.zip › oblimap-2.0-supplement/src/Makefile.ifort-stampede]

# Configuration for the fortran ifort compiler (Stampede at XSEDE):

# To use the ifort compiler the following modules have to be loaded:
#   module load fortran netcdf

# Compiler names:
  F90 = ifort

# Setting the path for the netcdf libraries:
  NETCDF_PATH = ${TACC_NETCDF_DIR}

# Compiler flags:
  COMPILER_FLAGS_BASIC    = -O3 -no-prec-div -module ${MOD_PATH}
  COMPILER_FLAGS_CHECK    = #-traceback
  COMPILER_FLAGS_NETCDF   = -I${NETCDF_PATH}/include
  COMPILER_FLAGS_PROFILE  = -p
  COMPILER_FLAGS_VALGRIND = -g

# Compiler flag combination choices:
  F90FLAGS_CHOICE_1       = ${COMPILER_FLAGS_BASIC} ${COMPILER_FLAGS_CHECK} ${COMPILER_FLAGS_NETCDF}
  F90FLAGS_CHOICE_2       = ${COMPILER_FLAGS_BASIC} ${COMPILER_FLAGS_CHECK} ${COMPILER_FLAGS_NETCDF} ${COMPILER_FLAGS_PROFILE}
  F90FLAGS_CHOICE_3       = ${COMPILER_FLAGS_BASIC} ${COMPILER_FLAGS_CHECK} ${COMPILER_FLAGS_NETCDF}                           ${COMPILER_FLAGS_VALGRIND}

# Compiling options concern including the profiling or the valgrind debugging mode:
  F90FLAGS                = ${F90FLAGS_CHOICE_2}

# Linking flags of libaries:
  LINK_FLAGS_NETCDF       = -L${NETCDF_PATH}/lib -lnetcdf -lnetcdff
  LDFLAGS                 = ${LINK_FLAGS_NETCDF}


#   Compiler flags                    Specification
#
#  -O3                                is the  optimalisation flag (causing faster executables)
#  -no-prec-div                       is the  flag for
#  -module ${MOD_PATH}                is the  path of directory with all the *.mod files  
#  -nocheck                           is the  flag for
#  -I${NETCDF_PATH}/include           is the  path to the netcdf include files  
#  -p                                 is the  flag for profiling with gmon (sometimes better to turn off if using valgrind)
#  -g                                 is the  flag which should be turned on if the valgrind debugger is used
# Linking flags of libaries:
#  -L${NETCDF_PATH}/lib               is the  netcdf libary path
#  -lnetcdf                           is the  netcdf c libary
#  -lnetcdff                          is the  netcdf fortran libary

# Linking the fortran compiler with  -g -w  for debugging with valgrind but omit profiling while using valgrind:
# valgrind --log-file=log-valgrind-gcm_to_im.bug --tool=memcheck --leak-check=yes --show-reachable=yes --num-callers=20 --track-fds=yes --track-origins=yes ./src/oblimap_gcm_to_im_program config-files/oblimap/ccsm-to-im/config_oblimap_ccsm_to_im_greenland
# valgrind --log-file=log-valgrind-im_to_gcm.bug --tool=memcheck --leak-check=yes --show-reachable=yes --num-callers=20 --track-fds=yes --track-origins=yes ./src/oblimap_im_to_gcm_program config-files/oblimap/im-to-ccsm/config_oblimap_im_to_ccsm_greenland
